# Supplementary material
Source: MDPI journal article supplement (https://www.mdpi.com/2073-4441/8/11/540)
Supplement: s1 [file s1]

# Supplementary Materials: Water Governance in England: Improving Understandings and Practices through Systemic Co-Inquiry

Natalie Foster, Kevin Collins, Ray Ison and Chris Blackmore

**Table S1.** Workshop participants.

| Stakeholder Group   | Organisation            | Name            | Workshop 1 | Workshop 2 |
|---------------------|-------------------------|-----------------|------------|------------|
| CADWAGO researchers | Open University         | Chris Blackmore | ✓          | ✓          |
|                     |                         | Kevin Collins   | ✓          | ✓          |
|                     |                         | Natalie Foster  | ✓          | ✓          |
|                     |                         | Ray Ison        | ✓          | ✓          |
| Government bodies   | yellow <sup>DEFRA</sup> | Richard Cole    | ✓          | ✓          |
|                     |                         | Ashley Holt     | ✓          | ✓          |
|                     | Environment Agency      | Damian Crilly   | ✓          |            |
|                     |                         | Clare Johnstone | ✓          |            |
|                     | Natural England         | James Grischeff | ✓          |            |
|                     |                         |                 |            |            |
| Consultants         | Cascade Consulting      | Kieran Conlan   | ✓          |            |
|                     | WRc                     | Jennifer Horn   | ✓          | ✓          |
|                     | Independent consultants | Chris Ryder     | ✓          |            |
|                     |                         | Alex Inman      | ✓          |            |
|                     |                         | John Colvin     |            | ✓          |
| NGOs                | The Rivers Trust        | Arlin Rickard   | ✓          | ✓          |
|                     | NFU                     | Paul Hammett    | ✓          | ✓          |
|                     | Water UK                | Sarah Mukherjee |            | ✓          |
|                     | RSPB                    | Mark Robins     |            | ✓          |
| Academics           | Sheffield University    | Bob Harris      | ✓          |            |
|                     | Middlesex University    | Paula Micou     |            | ✓          |

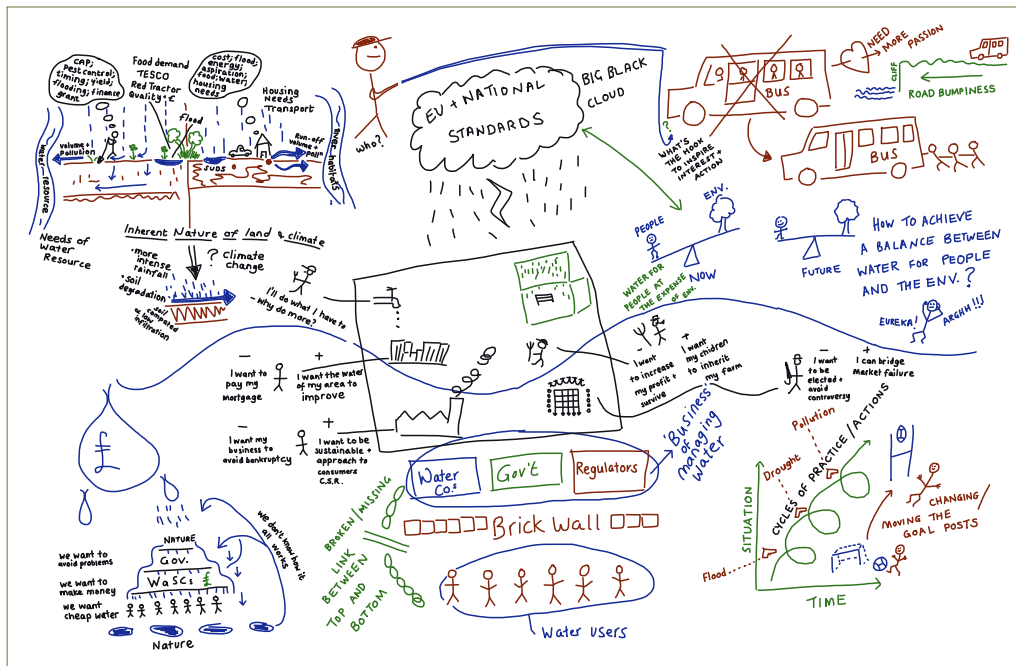

(a)

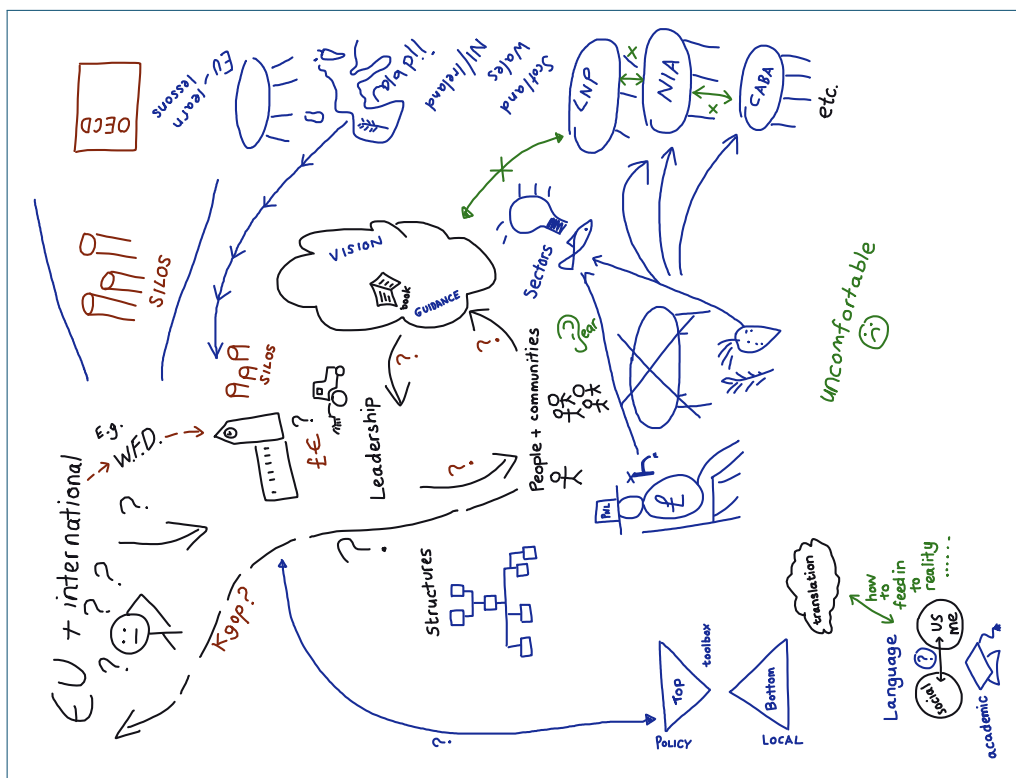

(b)

**Figure S1. Cont.**

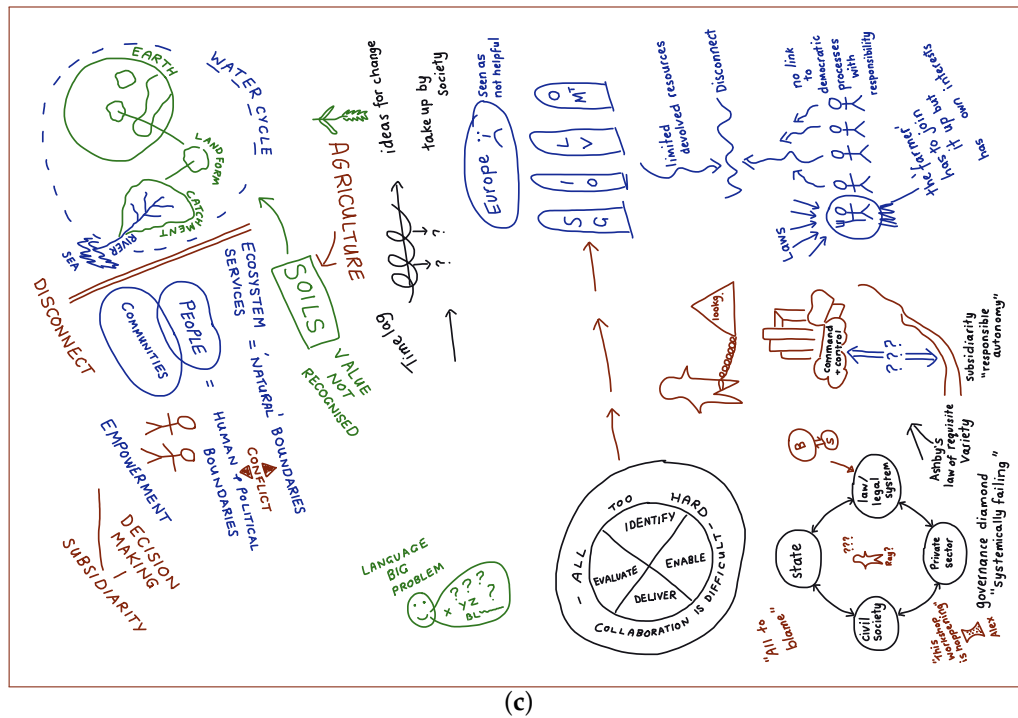

**Figure S1.** Rich pictures of the current water governance situation in England drawn by the workshop participants (redrawn from the versions created at the workshop) [1]. (a) Group 1; (b) Group 2; (c) Group 3.

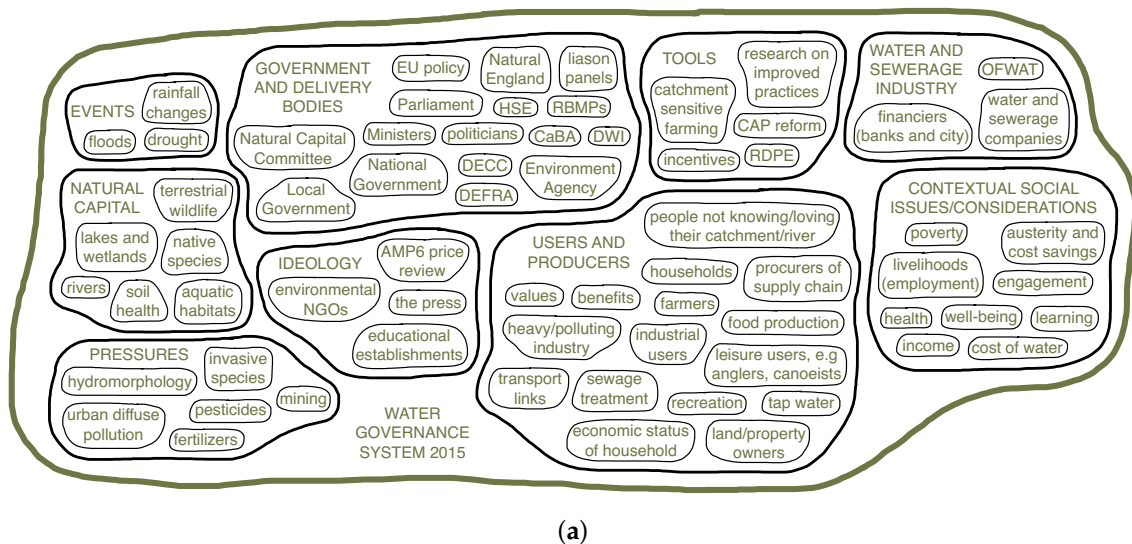

**Figure S2.** Cont.

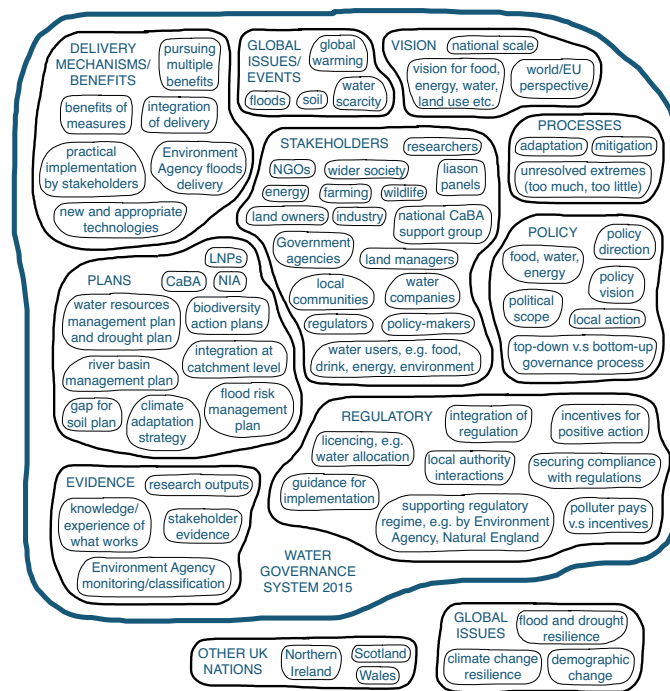

(b)

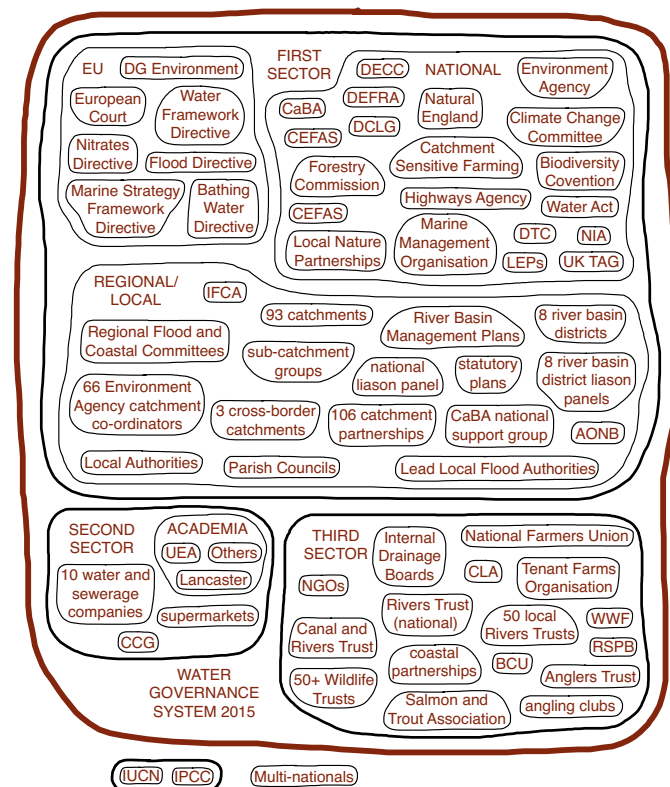

(c)

**Figure S2.** Systems maps of the current water governance situation in England constructed by the workshop participants (redrawn from the versions created at the workshop) [1]. (a) Group 1; (b) Group 2; (c) Group 3.

**Table S2.** BATWOVE and root definition applied to the current water governance situation in England by the workshop participants (redrawn from the versions created at the workshop) [1].

|                 |                                                                                                                                                                                                                                                                                                                                       |
|-----------------|---------------------------------------------------------------------------------------------------------------------------------------------------------------------------------------------------------------------------------------------------------------------------------------------------------------------------------------|
| <b>Group 1</b>  |                                                                                                                                                                                                                                                                                                                                       |
| Beneficiaries   | Politicians, ministers, bill payers, fish and shellfish industry, water users/consumers, some ecosystems, recreational users, irrigators                                                                                                                                                                                              |
| Actors          | Press (media), academics, teachers, farmers, NGOs and other third sector volunteers, water and sewerage companies, Environment Agency, Natural England, OFWAT                                                                                                                                                                         |
| Transformation  | Public water supplied and waste water treated                                                                                                                                                                                                                                                                                         |
| Worldview       | Provide goods and services to society, provide clean drinking water, natural capital under-valued                                                                                                                                                                                                                                     |
| Owners          | Property owners, water and sewerage companies, Government, voters, regulators, EU Parliament and Council                                                                                                                                                                                                                              |
| Victims         | Ecosystems, current citizens, future generations                                                                                                                                                                                                                                                                                      |
| Environment     | Climate change, capitalism dominates, risk aversion                                                                                                                                                                                                                                                                                   |
| Root definition | A disconnected and opaque system, nominally owned by everyone but managed by EU, Government and water companies, to provide goods and services by delivering public water supply and waste water treatment using inefficient high energy, engineering, top-down regulatory approaches in order to support economic growth and welfare |
| <b>Group 2</b>  |                                                                                                                                                                                                                                                                                                                                       |
| Beneficiaries   | People—consumers of drinking water and food, anglers, canoeists, water companies                                                                                                                                                                                                                                                      |
| Actors          | Consumers, water companies, policy-makers, regulators, farmers, food producers, NGOs, spatial planners                                                                                                                                                                                                                                |
| Transformation  | Supply potable water to society as part of an integrated approach                                                                                                                                                                                                                                                                     |
| Worldview       | We need to find a better balance between water for people and the environment                                                                                                                                                                                                                                                         |
| Owners          | DEFRA, Environment Agency and ?                                                                                                                                                                                                                                                                                                       |
| Victims         | People—farmers, people experiencing our water footprint outside the UK, those who can't afford to pay bills, water companies, swimming pool owners, garden lawns; and environment—flora and fauna                                                                                                                                     |
| Environment     | Regulatory regime favours drinking water, public supply favours drinking water in water scarcity, limitations in abilities to respond to drought (e.g., hosepipe bans)                                                                                                                                                                |
| Root definition | A system that privileges the needs of consumers of drinking water over the needs of farmers and water exporters in times of drought to avoid civil unrest through the extensive regulatory regime that we sustain                                                                                                                     |
| <b>Group 3</b>  |                                                                                                                                                                                                                                                                                                                                       |
| Beneficiaries   | Supermarkets, consumers, water companies, agro-chemical companies, current and future generations                                                                                                                                                                                                                                     |
| Actors          | Farmers, supply chain managers, catchment communities, catchment citizens                                                                                                                                                                                                                                                             |
| Transformation  | Trade and processing, supermarket selling environment, distribution of food security, science and technology, enlightenment, responsibility for government not taken → responsibility taken                                                                                                                                           |
| Worldview       | Cheap food trumps everything, water is 'common'                                                                                                                                                                                                                                                                                       |
| Owners          | Shareholders, customers, society                                                                                                                                                                                                                                                                                                      |
| Victims         | Ecosystem services, farmers livelihoods in the long-term, future generations, biodiversity                                                                                                                                                                                                                                            |
| Environment     | Ignorance, adversarial, conspiratorial, dis-functional institutional arrangements, need for an environment of transparency                                                                                                                                                                                                            |
| Root definition | A system to position the current water governance system to a citizen-based 'commons management' mode in order to act responsibly in the interests of future generations                                                                                                                                                              |

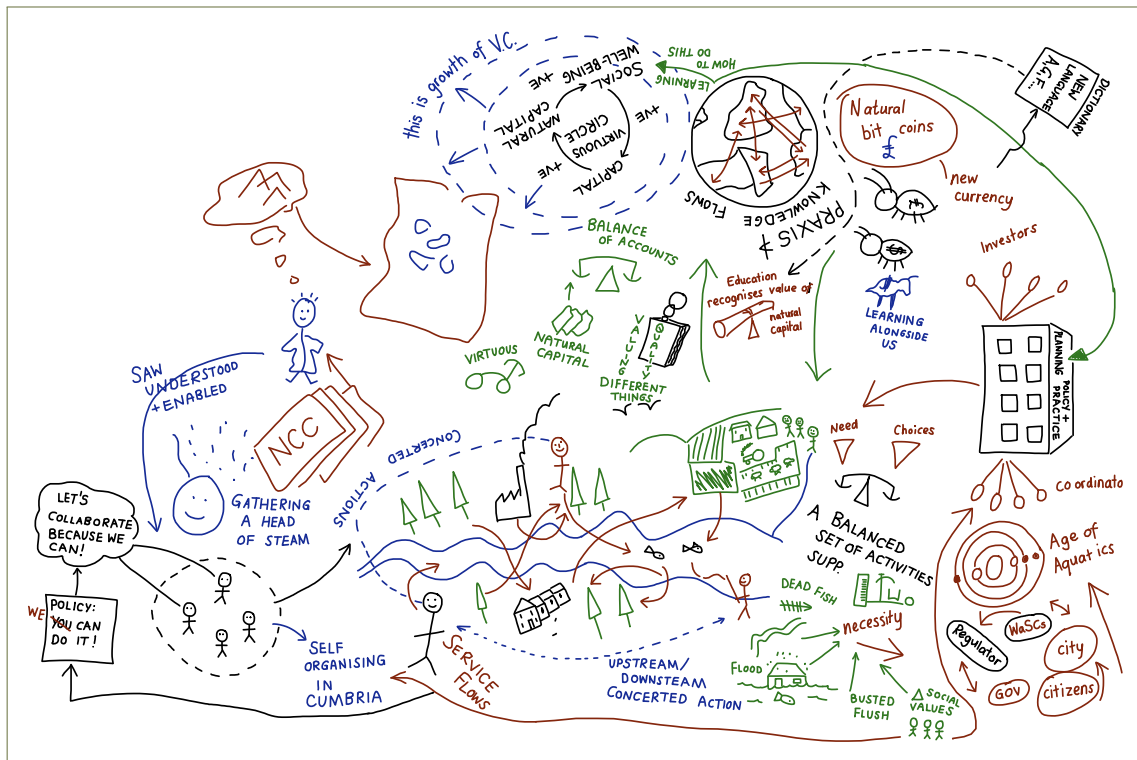

**(a)**

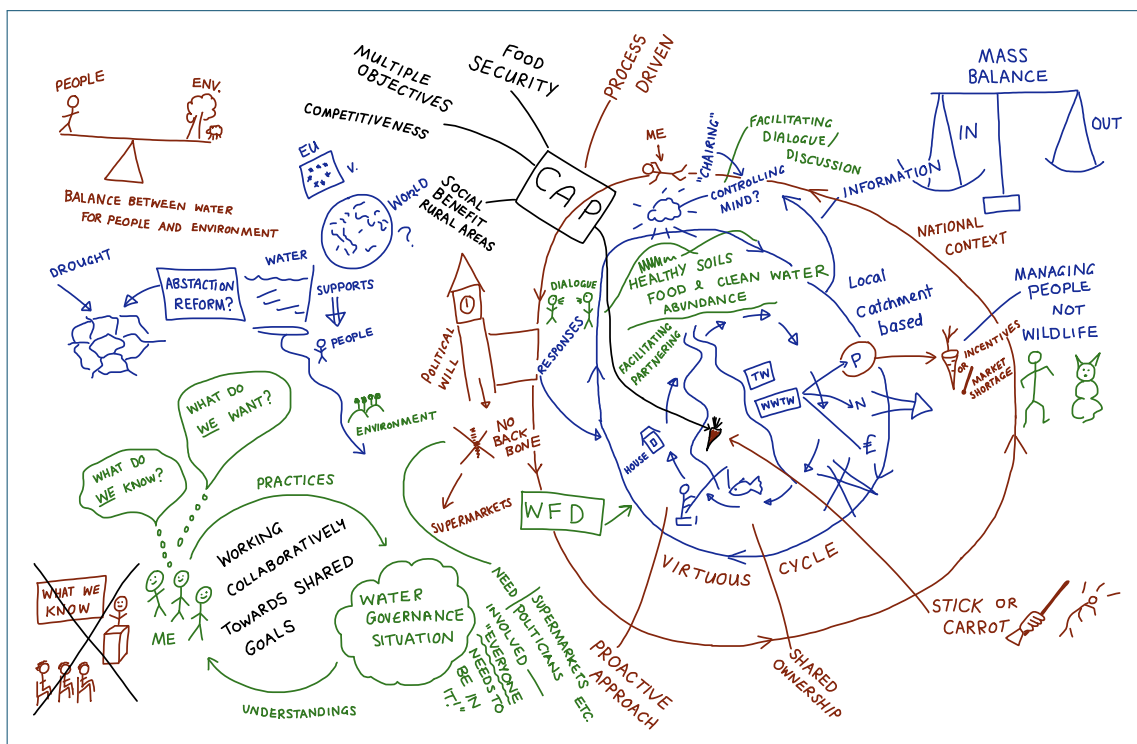

(b)

Figure S3. Cont.

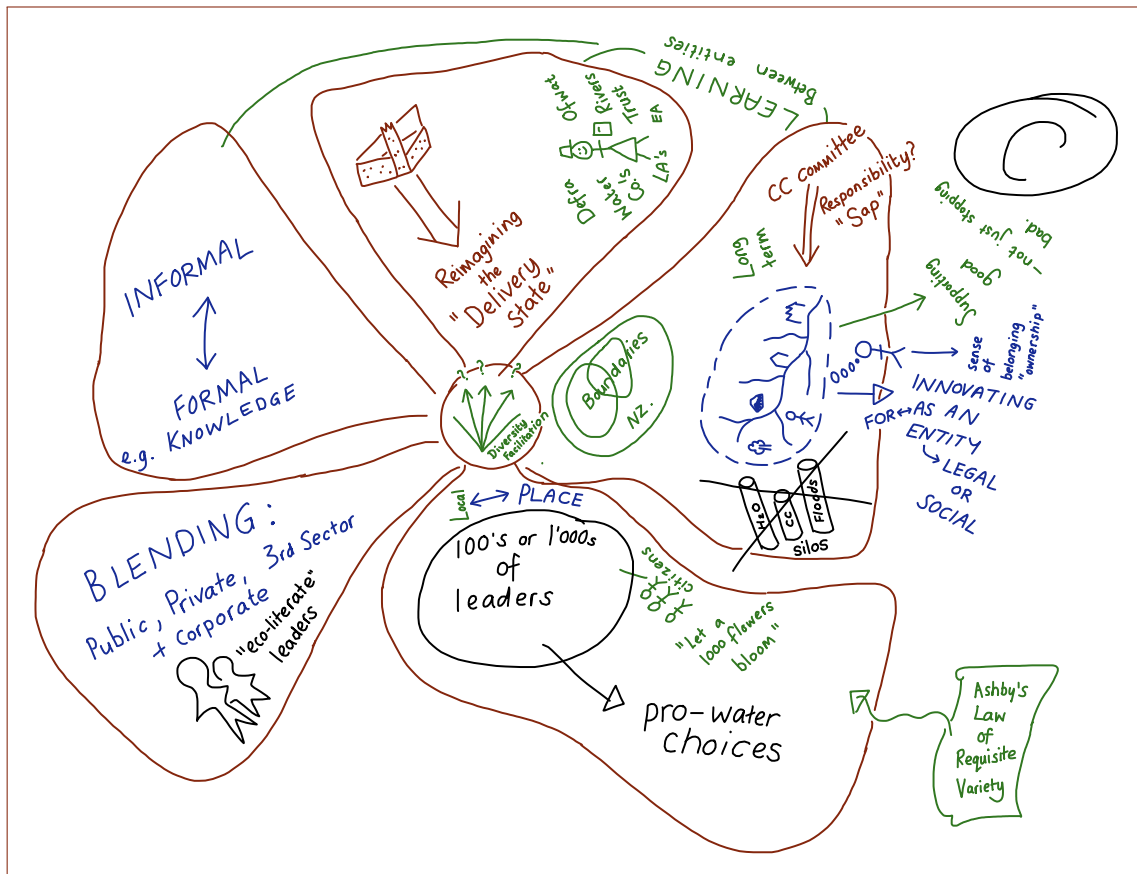

**Figure S3.** Rich pictures of an 'ideal' water governance situation in England drawn by the workshop participants (redrawn from the versions created at the workshop) [1]. (a) Group 1; (b) Group 2; (c) Group 3.

**Table S3.** BATWOVE and root definition applied to the ‘ideal’ water governance situation in England by the workshop participants (redrawn from the versions created at the workshop) [1].

|                 |                                                                                                                                                                                                                                                                                                                                                                                                                                                                                                      |
|-----------------|------------------------------------------------------------------------------------------------------------------------------------------------------------------------------------------------------------------------------------------------------------------------------------------------------------------------------------------------------------------------------------------------------------------------------------------------------------------------------------------------------|
| <b>Group 1</b>  |                                                                                                                                                                                                                                                                                                                                                                                                                                                                                                      |
| Beneficiaries   | Citizens, serving industries, new entrepreneurs, water companies, Government, farmers, natural environment                                                                                                                                                                                                                                                                                                                                                                                           |
| Actors          | Citizens, serving industries, new entrepreneurs, water companies, Government, farmers, natural environment, educational apparatus                                                                                                                                                                                                                                                                                                                                                                    |
| Transformation  | Knowledge and services not flowing → knowledge and services flowing                                                                                                                                                                                                                                                                                                                                                                                                                                  |
| Worldview       | It is desirable to move from a vicious to a virtuous circle between quality of life, economic activity and natural capital                                                                                                                                                                                                                                                                                                                                                                           |
| Owners          | Citizens, serving industries, new entrepreneurs, water companies, Government, farmers, natural environment                                                                                                                                                                                                                                                                                                                                                                                           |
| Victims         | People stuck in the old ways (status quo)                                                                                                                                                                                                                                                                                                                                                                                                                                                            |
| Environment     | 20th century capitalism dominates; biased regulatory regime; aversion to risk and innovation; fear of radical reframing                                                                                                                                                                                                                                                                                                                                                                              |
| Root definition | A system of governance to enable knowledge and science flows by: community self-organisation and representation; investing and developing a social infrastructure for learning the value of natural capital and social well-being; developing new market mechanisms; and continuing to evolve and adapt in order to enable a growing virtuous circle between quality of life, economic activity and natural capital                                                                                  |
| <b>Group 2</b>  |                                                                                                                                                                                                                                                                                                                                                                                                                                                                                                      |
| Beneficiaries   | Citizens (people) and the environment upon which they depend                                                                                                                                                                                                                                                                                                                                                                                                                                         |
| Actors          | Society (with multiple/specific roles)                                                                                                                                                                                                                                                                                                                                                                                                                                                               |
| Transformation  | Optimise the management of water in all its forms                                                                                                                                                                                                                                                                                                                                                                                                                                                    |
| Worldview       | Human health and well-being                                                                                                                                                                                                                                                                                                                                                                                                                                                                          |
| Owners          | Everyone                                                                                                                                                                                                                                                                                                                                                                                                                                                                                             |
| Victims         | People whose current granted rights/interests will be adversely affected by the ‘ideal’ governance system, e.g., water abstractors                                                                                                                                                                                                                                                                                                                                                                   |
| Environment     | social, environmental and economic capital                                                                                                                                                                                                                                                                                                                                                                                                                                                           |
| Root definition | An iterative learning system operated by a ‘system operator’ on behalf of everyone and within a set framework, to optimise the management of water in all its forms by engaging and empowering society to make equitable decisions and take collective/concerted actions, in order to deliver human health and well-being (with recognition that health and well-being depends upon a healthy, functioning natural environment) within the constraints of social, environmental and economic capital |
| <b>Group 3</b>  |                                                                                                                                                                                                                                                                                                                                                                                                                                                                                                      |
| Beneficiaries   | Citizens, consumers, entrepreneurs, places                                                                                                                                                                                                                                                                                                                                                                                                                                                           |
| Actors          | CaBA, DEFRA, key NGOs, artists and dramaturgists, landowners, local community groups, champion/key individuals                                                                                                                                                                                                                                                                                                                                                                                       |
| Transformation  | Conditions not created → conditions created                                                                                                                                                                                                                                                                                                                                                                                                                                                          |
| Worldview       | Citizen-led leadership and choice will deliver adaptive governance                                                                                                                                                                                                                                                                                                                                                                                                                                   |
| Owners          | Citizens, facilitators, civil society organisations                                                                                                                                                                                                                                                                                                                                                                                                                                                  |
| Victims         | ?                                                                                                                                                                                                                                                                                                                                                                                                                                                                                                    |
| Environment     | Political elite, “Establishment”, non-reflexive researchers and professionals, economists? citizens not part of the key ... in governing,                                                                                                                                                                                                                                                                                                                                                            |
| Root definition | A system to create the conditions for orchestrated, citizen-led leadership and choice in adaptive catchment governing, which is experienced as empowering and innovative                                                                                                                                                                                                                                                                                                                             |

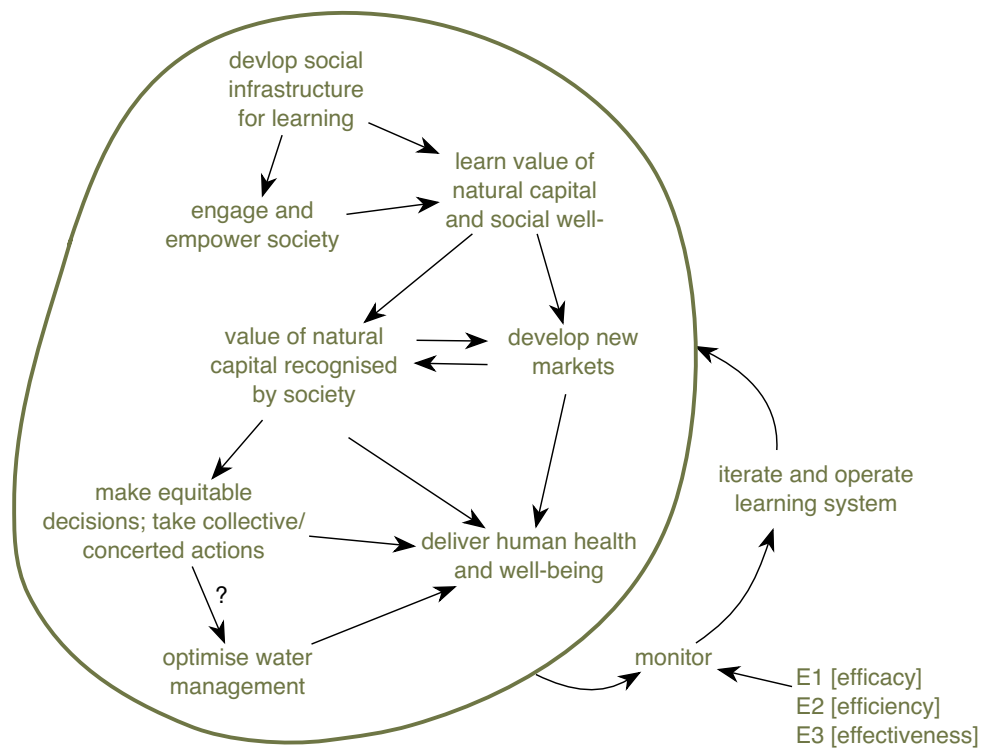

(a)

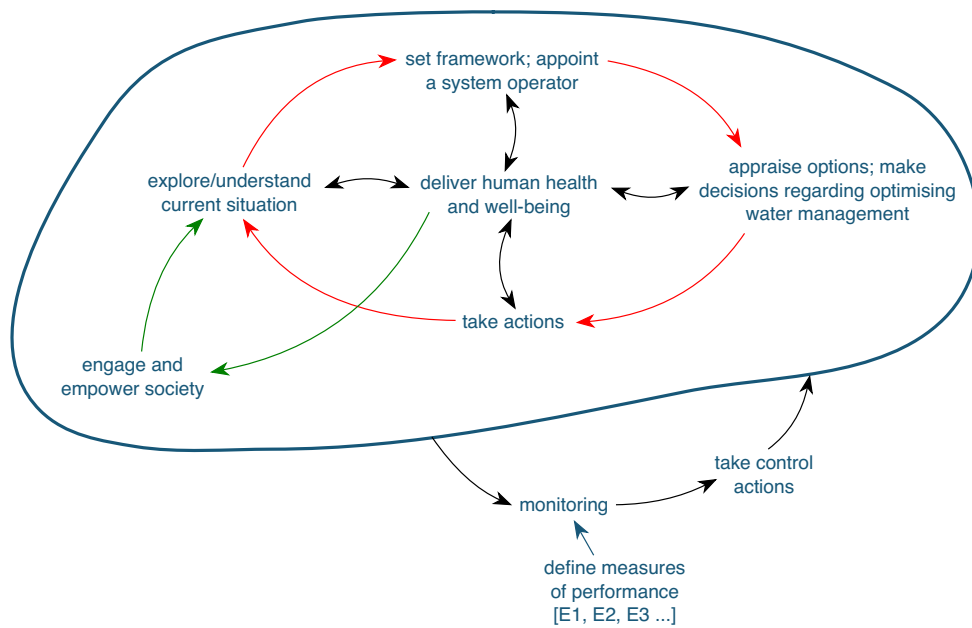

(b)

Figure S4. Cont.

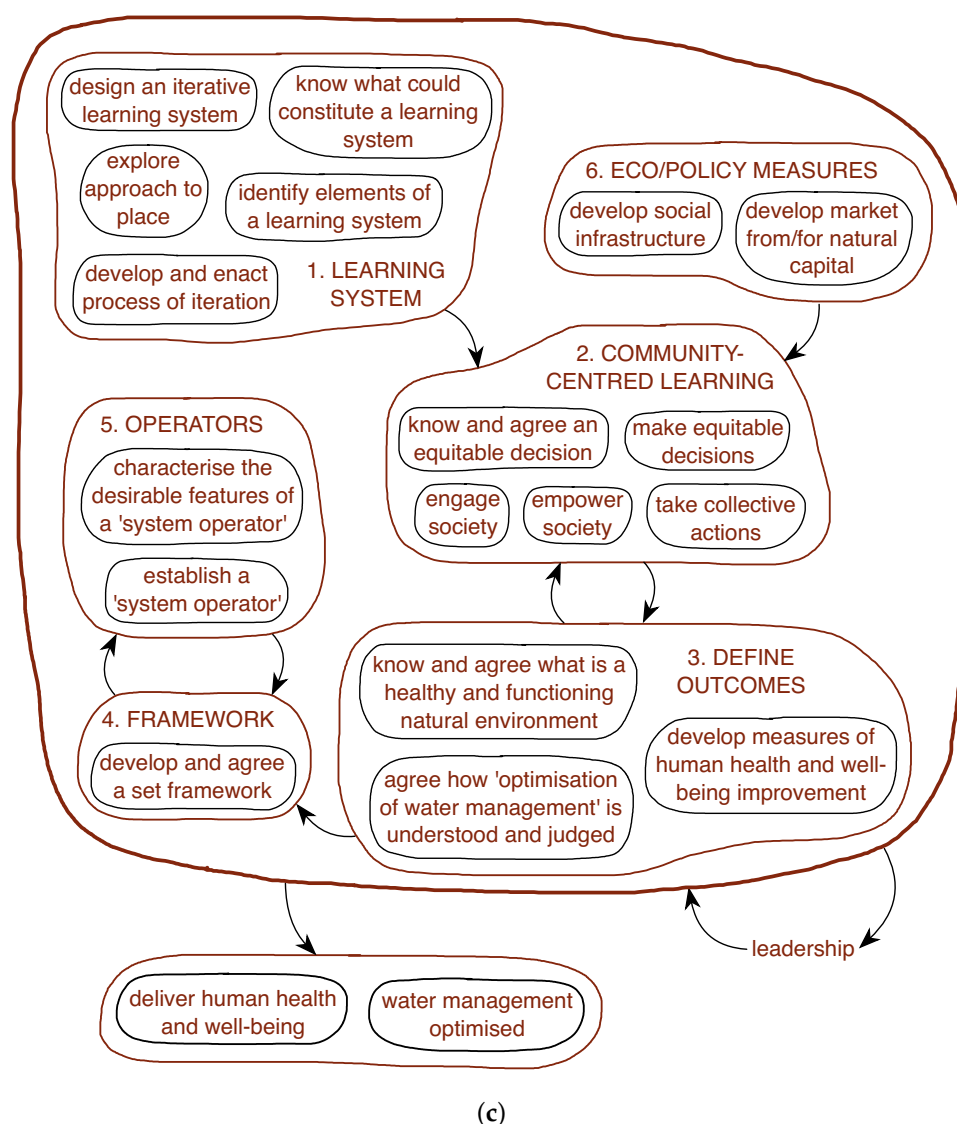

**Figure S4.** Conceptual models of an 'ideal' water governance situation in England constructed by the workshop participants (redrawn from the versions created at the workshop) [1]. (a) Group 1; (b) Group 2; (c) Group 3.

## References

1. Foster, N.; Collins, K.; Ison, R.; Blackmore, C. *Water Governance in England. Improving Understandings and Practices through Systemic Co-Inquiry*; Workshop Report; The Open University: Milton Keynes, UK, 2015.
